# Supplementary material for: Genotype-to-Phenotype Associations in the Aggressive Variant Prostate Cancer Molecular Profile (AVPC-m) Components
Source: MDPI journal article supplement (doi:10.3390/cancers14133233), 2022-06-30
Supplement: s1 [file s1]

# Supplementary Figure S3

TSP Pathway Loss Transcriptional Signature Scores

p53 1+2+3+

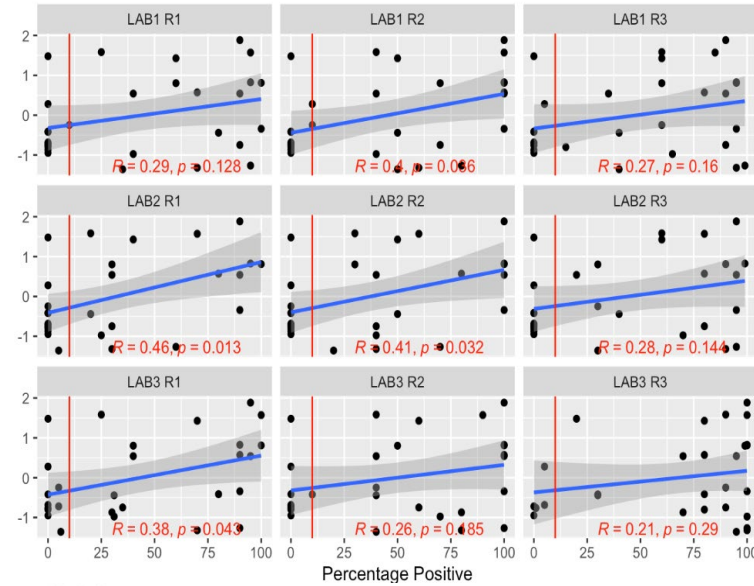

p53 2+3+

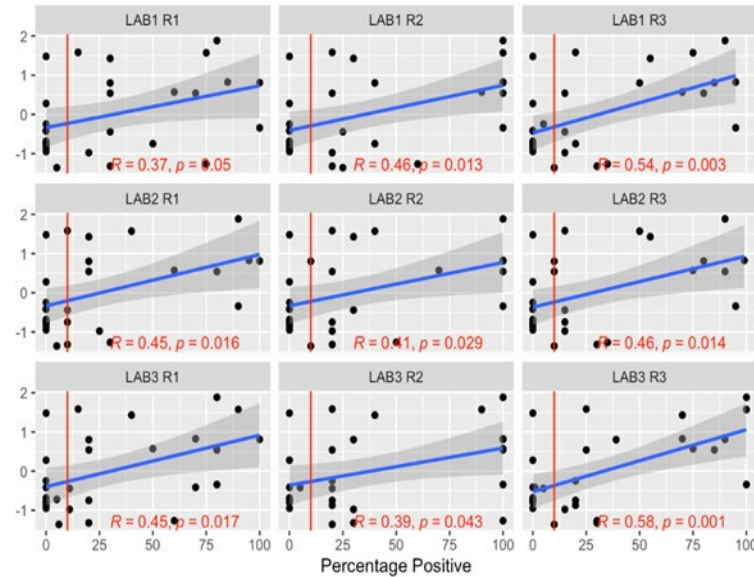

RB1 1+2+3+

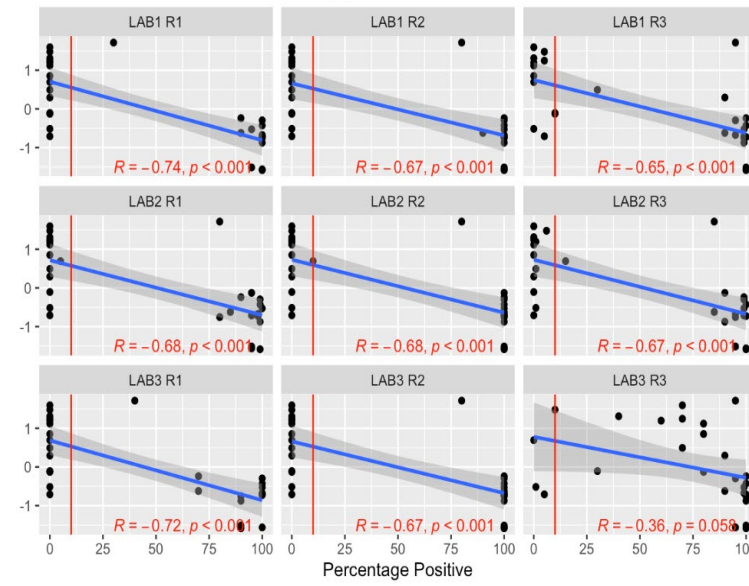

RB1 2+3+

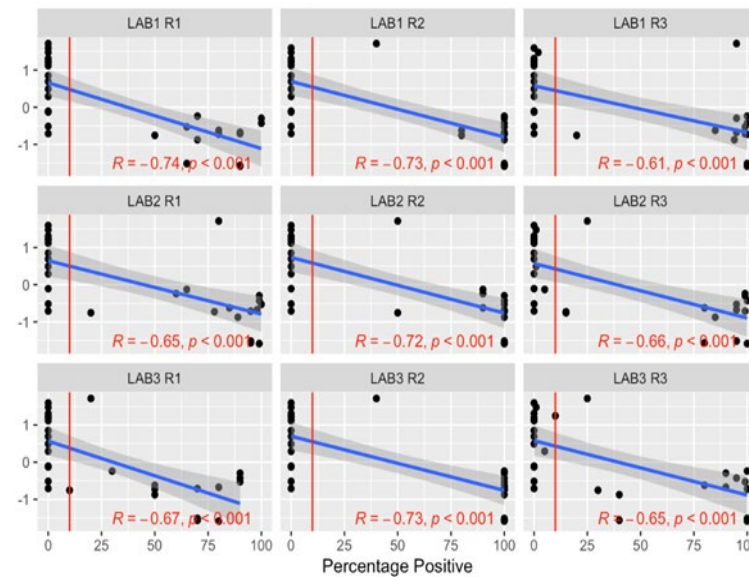

PTEN 1+2+3+

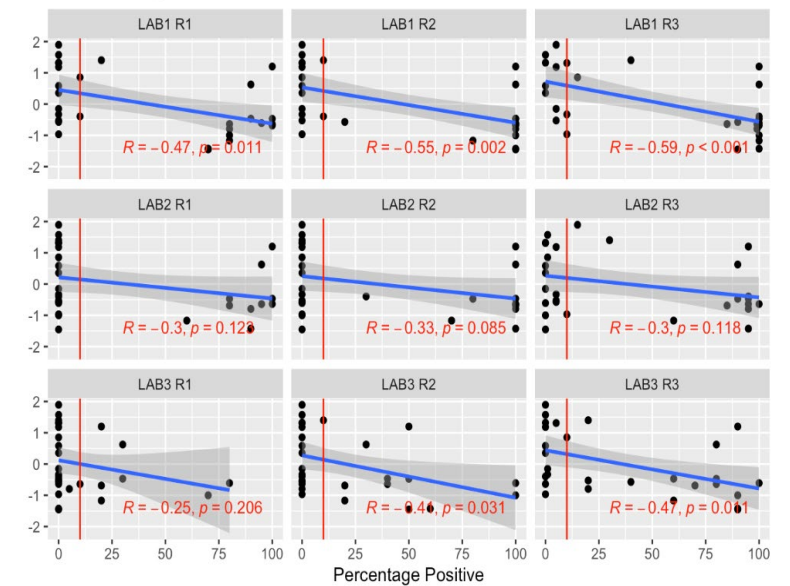

PTEN 2+3+

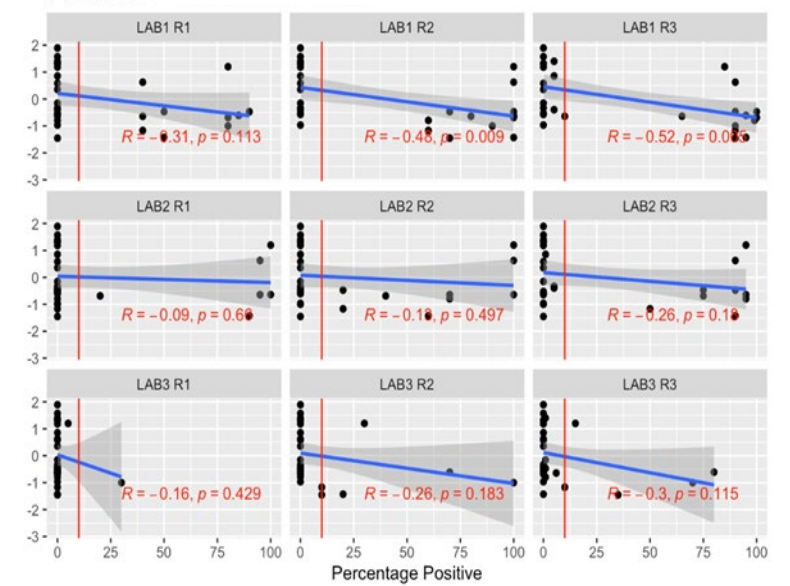

Percentage Positive Staining (IHC)
