# Supplementary material for: Genotype-to-Phenotype Associations in the Aggressive Variant Prostate Cancer Molecular Profile (AVPC-m) Components
Source: MDPI journal article supplement (doi:10.3390/cancers14133233), 2022-06-30
Supplement: s1 [file s1]

**Supplementary Table S1**

| <b>PDX</b>    | <b>Morphology</b> | <b>% malignant cells in FFPE slide</b> | <b>Representative H&amp;E image (all images 20X)</b>                                 |
|---------------|-------------------|----------------------------------------|--------------------------------------------------------------------------------------|
| <b>118-B</b>  | <b>adenoCa</b>    | <b>85</b>                              | 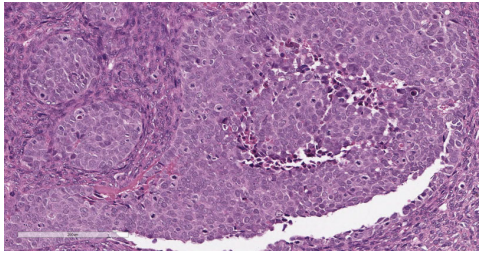   |
| <b>163-A</b>  | <b>adenoCa</b>    | <b>80</b>                              |    |
| <b>173-2</b>  | <b>adenoCa</b>    | <b>85</b>                              |   |
| <b>177-B</b>  | <b>adenoCa</b>    | <b>70</b>                              |  |
| <b>178-11</b> | <b>adenoCa</b>    | <b>75</b>                              |  |

|              |                |           |                                                                                      |
|--------------|----------------|-----------|--------------------------------------------------------------------------------------|
| <b>189-1</b> | <b>adenoCa</b> | <b>80</b> | 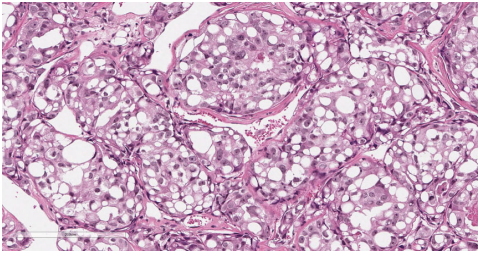   |
| <b>211-3</b> | <b>SCC</b>     | <b>75</b> |    |
| <b>266-A</b> | <b>adenoCa</b> | <b>65</b> |    |
| <b>117-9</b> | <b>adenoCa</b> | <b>80</b> |   |
| <b>133-4</b> | <b>adenoCa</b> | <b>60</b> |  |
| <b>170-1</b> | <b>adenoCa</b> | <b>75</b> |  |



|               |                |           |                                                                                      |
|---------------|----------------|-----------|--------------------------------------------------------------------------------------|
| <b>180-30</b> | <b>adenoCa</b> | <b>80</b> | 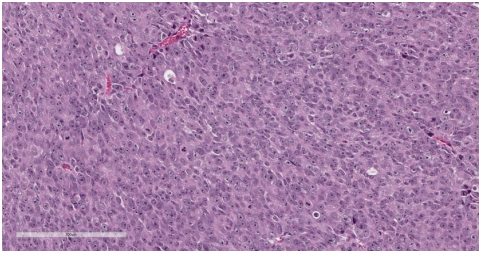   |
| <b>183-A</b>  | <b>adenoCa</b> | <b>90</b> |    |
| <b>203-A</b>  | <b>adenoCa</b> | <b>75</b> |    |
| <b>265-6</b>  | <b>adenoCa</b> | <b>25</b> |   |
| <b>270-A</b>  | <b>adenoCa</b> | <b>85</b> |  |
| <b>137-8</b>  | <b>adenoCa</b> | <b>70</b> |  |

|               |                |           |                                                                                      |
|---------------|----------------|-----------|--------------------------------------------------------------------------------------|
| <b>152-1</b>  | <b>adenoCa</b> | <b>30</b> | 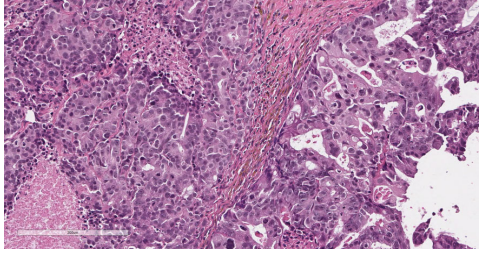   |
| <b>144-13</b> | <b>SCC</b>     | <b>25</b> |    |
| <b>146-10</b> | <b>SCC</b>     | <b>75</b> |    |
| <b>150-3</b>  | <b>SCC</b>     | <b>60</b> |   |
| <b>155-2</b>  | <b>SCC</b>     | <b>30</b> |  |
| <b>255-A</b>  | <b>SCC</b>     | <b>85</b> |  |



|               |            |           |                                                                                      |
|---------------|------------|-----------|--------------------------------------------------------------------------------------|
| <b>273-A</b>  | <b>SCC</b> | <b>50</b> | 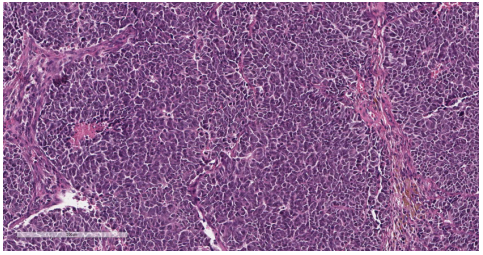   |
| <b>277-1</b>  | <b>SCC</b> | <b>75</b> |    |
| <b>312-7</b>  | <b>SCC</b> | <b>60</b> |    |
| <b>314-10</b> | <b>SCC</b> | <b>90</b> |   |
| <b>328-5</b>  | <b>SCC</b> | <b>50</b> |  |
