# Supplementary material for: Genotype-to-Phenotype Associations in the Aggressive Variant Prostate Cancer Molecular Profile (AVPC-m) Components
Source: MDPI journal article supplement (doi:10.3390/cancers14133233), 2022-06-30
Supplement: s1 [file s1]

Supplementary Table S4

|    | MDA PCa<br>PDX | TP53                     |                               | RB1                      |                               | PTEN                     |                               | AVPC by IHC (Y/N) | AVPC by Genomics<br>(Y/N) | AVPC by IHC and/or<br>Genomics (Y/N) |
|----|----------------|--------------------------|-------------------------------|--------------------------|-------------------------------|--------------------------|-------------------------------|-------------------|---------------------------|--------------------------------------|
|    |                | Abnormal by IHC<br>(Y/N) | Abnormal by Genomics<br>(Y/N) | Abnormal by IHC<br>(Y/N) | Abnormal by Genomics<br>(Y/N) | Abnormal by IHC<br>(Y/N) | Abnormal by Genomics<br>(Y/N) |                   |                           |                                      |
| 1  | 177-B          | Y                        | Y (ms Y163N)                  | Y                        | Y (del)                       | Y                        | N                             | Y                 | Y                         | Y                                    |
| 2  | 266-A          | Y                        | NA                            | Y                        | NA                            | N                        | NA                            | Y                 | NA                        | Y                                    |
| 3  | 144-13         | Y                        | Y (del; ms R273C)             | Y                        | Y (del)                       | N                        | Y (del)                       | Y                 | Y                         | Y                                    |
| 4  | 211-3          | Y                        | NA                            | Y                        | NA                            | N                        | NA                            | Y                 | NA                        | Y                                    |
| 5  | 150-3          | Y                        | Y (ms E286K)                  | Y                        | Y (del; ss)                   | Y                        | Y (del)                       | Y                 | Y                         | Y                                    |
| 6  | 146-10         | Y                        | Y (del L330fs)                | Y                        | Y (del V450fs)                | N                        | N                             | Y                 | Y                         | Y                                    |
| 7  | 155-2          | Y                        | Y (ms C275Y)                  | Y                        | Y (del)                       | N                        | N                             | Y                 | Y                         | Y                                    |
| 8  | 314-10         | Y                        | Y (ms Y220C)                  | Y                        | Y (del)                       | N                        | Y (del)                       | Y                 | Y                         | Y                                    |
| 9  | 273-A          | Y                        | N                             | Y                        | Y (del)                       | N                        | N                             | Y                 | N                         | Y                                    |
| 10 | 189-1          | Y                        | NA                            | N                        | NA                            | Y                        | NA                            | Y                 | NA                        | Y                                    |
| 11 | 173-2          | Y                        | N                             | N                        | N                             | Y                        | Y (del)                       | Y                 | N                         | Y                                    |
| 12 | 117-9          | Y                        | N                             | N                        | N                             | N                        | N                             | N                 | N                         | N                                    |
| 13 | 328-5          | Y                        | N                             | Y                        | Y (del; ns Q631X)             | N                        | N                             | Y                 | N                         | Y                                    |
| 14 | 178-11         | Y                        | N                             | N                        | Y (del)                       | Y                        | Y (del)                       | Y                 | Y                         | Y                                    |
| 15 | 180-30         | Y                        | Y (ms R175L)                  | N                        | Y (ms I470T)                  | N                        | N                             | N                 | Y                         | Y                                    |
| 16 | 312-7          | Y                        | Y (ns E258X)                  | Y                        | Y (del)                       | N                        | N                             | Y                 | Y                         | Y                                    |
| 17 | 137-8          | Y                        | NA                            | N                        | NA                            | Y                        | NA                            | Y                 | NA                        | Y                                    |
| 18 | 203-A          | N                        | N                             | N                        | N                             | Y                        | Y (del)                       | N                 | N                         | N                                    |
| 19 | 118-B          | N                        | NA                            | Y                        | NA                            | N                        | NA                            | N                 | NA                        | N                                    |
| 20 | 163-A          | N                        | Y (ns R80X)                   | Y                        | Y (del)                       | N                        | N                             | N                 | Y                         | Y                                    |
| 21 | 133-4          | N                        | Y (del P62fs)                 | N                        | N                             | Y                        | Y (del)                       | N                 | Y                         | Y                                    |
| 22 | 170-1          | N                        | Y (del)                       | N                        | N                             | N                        | Y (del)                       | N                 | Y                         | Y                                    |
| 23 | 183-A          | N                        | N                             | N                        | N                             | Y                        | Y (del)                       | N                 | N                         | N                                    |
| 24 | 265-6          | N                        | Y (ns R213X)                  | N                        | Y (del)                       | N                        | N                             | N                 | Y                         | Y                                    |
| 25 | 270-A          | N                        | NA                            | N                        | NA                            | N                        | NA                            | N                 | NA                        | N                                    |
| 26 | 152-1          | N                        | NA                            | N                        | NA                            | Y                        | NA                            | N                 | NA                        | N                                    |
| 27 | 255-A          | N                        | NA                            | Y                        | NA                            | Y                        | NA                            | Y                 | NA                        | Y                                    |
| 28 | 277-1          | N                        | Y (ns W68X; ss)               | N                        | Y (del)                       | N                        | N                             | N                 | Y                         | Y                                    |

NA: Not Available

AVPC

non-AVPC

117-9, 203-A, 183-A, 270-A, 152-1, 118-B

ms = missense mutation

ns = nonsense mutation

ss = splice site mutation

fs = frame shift mutation
