# Supplementary material for: Genotype-to-Phenotype Associations in the Aggressive Variant Prostate Cancer Molecular Profile (AVPC-m) Components
Source: MDPI journal article supplement (doi:10.3390/cancers14133233), 2022-06-30
Supplement: s1 [file s1]

Supplementary Table S2

| Immunohistochemistry: Antibody details |                                                    |                                                                  |                                                     |                                                                       |                                                                       |                                                                       |                                                    |                                                     |                                                     |
|----------------------------------------|----------------------------------------------------|------------------------------------------------------------------|-----------------------------------------------------|-----------------------------------------------------------------------|-----------------------------------------------------------------------|-----------------------------------------------------------------------|----------------------------------------------------|-----------------------------------------------------|-----------------------------------------------------|
|                                        | LAB 1 (Clinical Lab)                               |                                                                  |                                                     | LAB 2                                                                 |                                                                       |                                                                       | LAB 3                                              |                                                     |                                                     |
|                                        | RB1                                                | TP53                                                             | PTEN                                                | RB1                                                                   | TP53                                                                  | PTEN                                                                  | RB1                                                | TP53                                                | PTEN                                                |
| <b>Biomarker</b>                       |                                                    |                                                                  |                                                     |                                                                       |                                                                       |                                                                       |                                                    |                                                     |                                                     |
| <b>Vendor</b>                          | Calbiochem                                         | Leica Microsystems                                               | Dako                                                | Abcam                                                                 | Abcam                                                                 | Cell Signaling Technology                                             | Millipore Sigma                                    | Dako                                                | Biocare Medical                                     |
| <b>Cat #</b>                           | OP66 (Ab-5)                                        | PA0057                                                           | M3627                                               | ab181616                                                              | ab32389                                                               | 9188                                                                  | OP66 (Ab-5)                                        | M7001                                               | CM278BK                                             |
| <b>Clone</b>                           | LM95.1                                             | DO-7                                                             | 6H2.1                                               | EPR17512                                                              | E26                                                                   | D4.3                                                                  | LM95.1                                             | DO-7                                                | 6H2.1                                               |
| <b>Type</b>                            | Mouse monoclonal                                   | Mouse monoclonal                                                 | Mouse monoclonal                                    | Rabbit monoclonal                                                     | Rabbit monoclonal                                                     | Rabbit monoclonal                                                     | Mouse monoclonal                                   | Mouse monoclonal                                    | Mouse monoclonal                                    |
| <b>Incubation conditions</b>           | 1:30 dilution, 15 min incubation, room temperature | 1:1 dilution (ready-to-use), 15 min incubation, room temperature | 1:100 dilution, 15 min incubation, room temperature | 1:500 dilution, 15 min incubation, room temperature                   | 1: 400 dilution, 15 min incubation, room temperature                  | 1:100 dilution, 15 min incubation, room temperature                   | 1:35 dilution, 60 min incubation, room temperature | 1:500 dilution, 60 min incubation, room temperature | 1:100 dilution, 60 min incubation, room temperature |
| <b>Antigen Retrieval</b>               | Tris EDTA Buffer, pH 9.0, 100°C, 20 min            | Tris EDTA Buffer, pH 9.0, 100°C, 20 min                          | Tris EDTA Buffer, pH 9.0, 100°C, 20 min             | BOND Epitope Retrieval Solution 1, pH 6.0, Cat# AR9961, 100°C, 20 min | BOND Epitope Retrieval Solution 1, pH 6.0, Cat# AR9961, 100°C, 20 min | BOND Epitope Retrieval Solution 2, pH 9.0, Cat# AR9640, 100°C, 20 min | Citrate Buffer, pH 6.0, 100°C, 30 min              | Citrate Buffer, pH 6.0, 100°C, 30 min               | Citrate Buffer, pH 6.0, 100°C, 30 min               |
| <b>Detection</b>                       | HRP-labeled polymer                                | HRP-labeled polymer                                              | HRP-labeled polymer                                 | HRP-labeled polymer                                                   | HRP-labeled polymer                                                   | HRP-labeled polymer                                                   | HRP-labeled polymer                                | HRP-labeled polymer                                 | HRP-labeled polymer                                 |
| <b>Chromogen</b>                       | DAB                                                | DAB                                                              | DAB                                                 | DAB                                                                   | DAB                                                                   | DAB                                                                   | DAB                                                | DAB                                                 | DAB                                                 |
| <b>Substrate</b>                       |                                                    |                                                                  |                                                     |                                                                       |                                                                       |                                                                       |                                                    |                                                     |                                                     |
| <b>Species</b>                         |                                                    |                                                                  |                                                     |                                                                       |                                                                       |                                                                       |                                                    |                                                     |                                                     |
| <b>Reactivity</b>                      | Human                                              | Human                                                            | Human                                               | Human, Mouse, Monkey                                                  | Human                                                                 | Human, Mouse, Rat, Monkey and Dog                                     | Human                                              | Human                                               | Human                                               |
