# Supplementary material for: Genotype-to-Phenotype Associations in the Aggressive Variant Prostate Cancer Molecular Profile (AVPC-m) Components
Source: MDPI journal article supplement (doi:10.3390/cancers14133233), 2022-06-30
Supplement: s1 [file s1]

Supplementary Table S3

|                  | <b>RB1</b>          | <b>TP53</b>                 | <b>PTEN</b>                                         |
|------------------|---------------------|-----------------------------|-----------------------------------------------------|
| Negative Control | H526 Cell Line      | H522 Cell line              | Cell Signaling<br>Technology Control Slide<br>#8106 |
|                  | Tonsil with Diluent | H841 Cell line with diluent | Placenta with Diluent                               |
| Positive Control | H841 Cell Line      | H841 Cell line              | Cell Signaling<br>Technology Control Slide<br>#8106 |
|                  | Tonsil              |                             | Placenta                                            |
