# Supplementary figures and images for: Genotype-to-Phenotype Associations in the Aggressive Variant Prostate Cancer Molecular Profile (AVPC-m) Components
Source: MDPI journal article supplement (doi:10.3390/cancers14133233), 2022-06-30

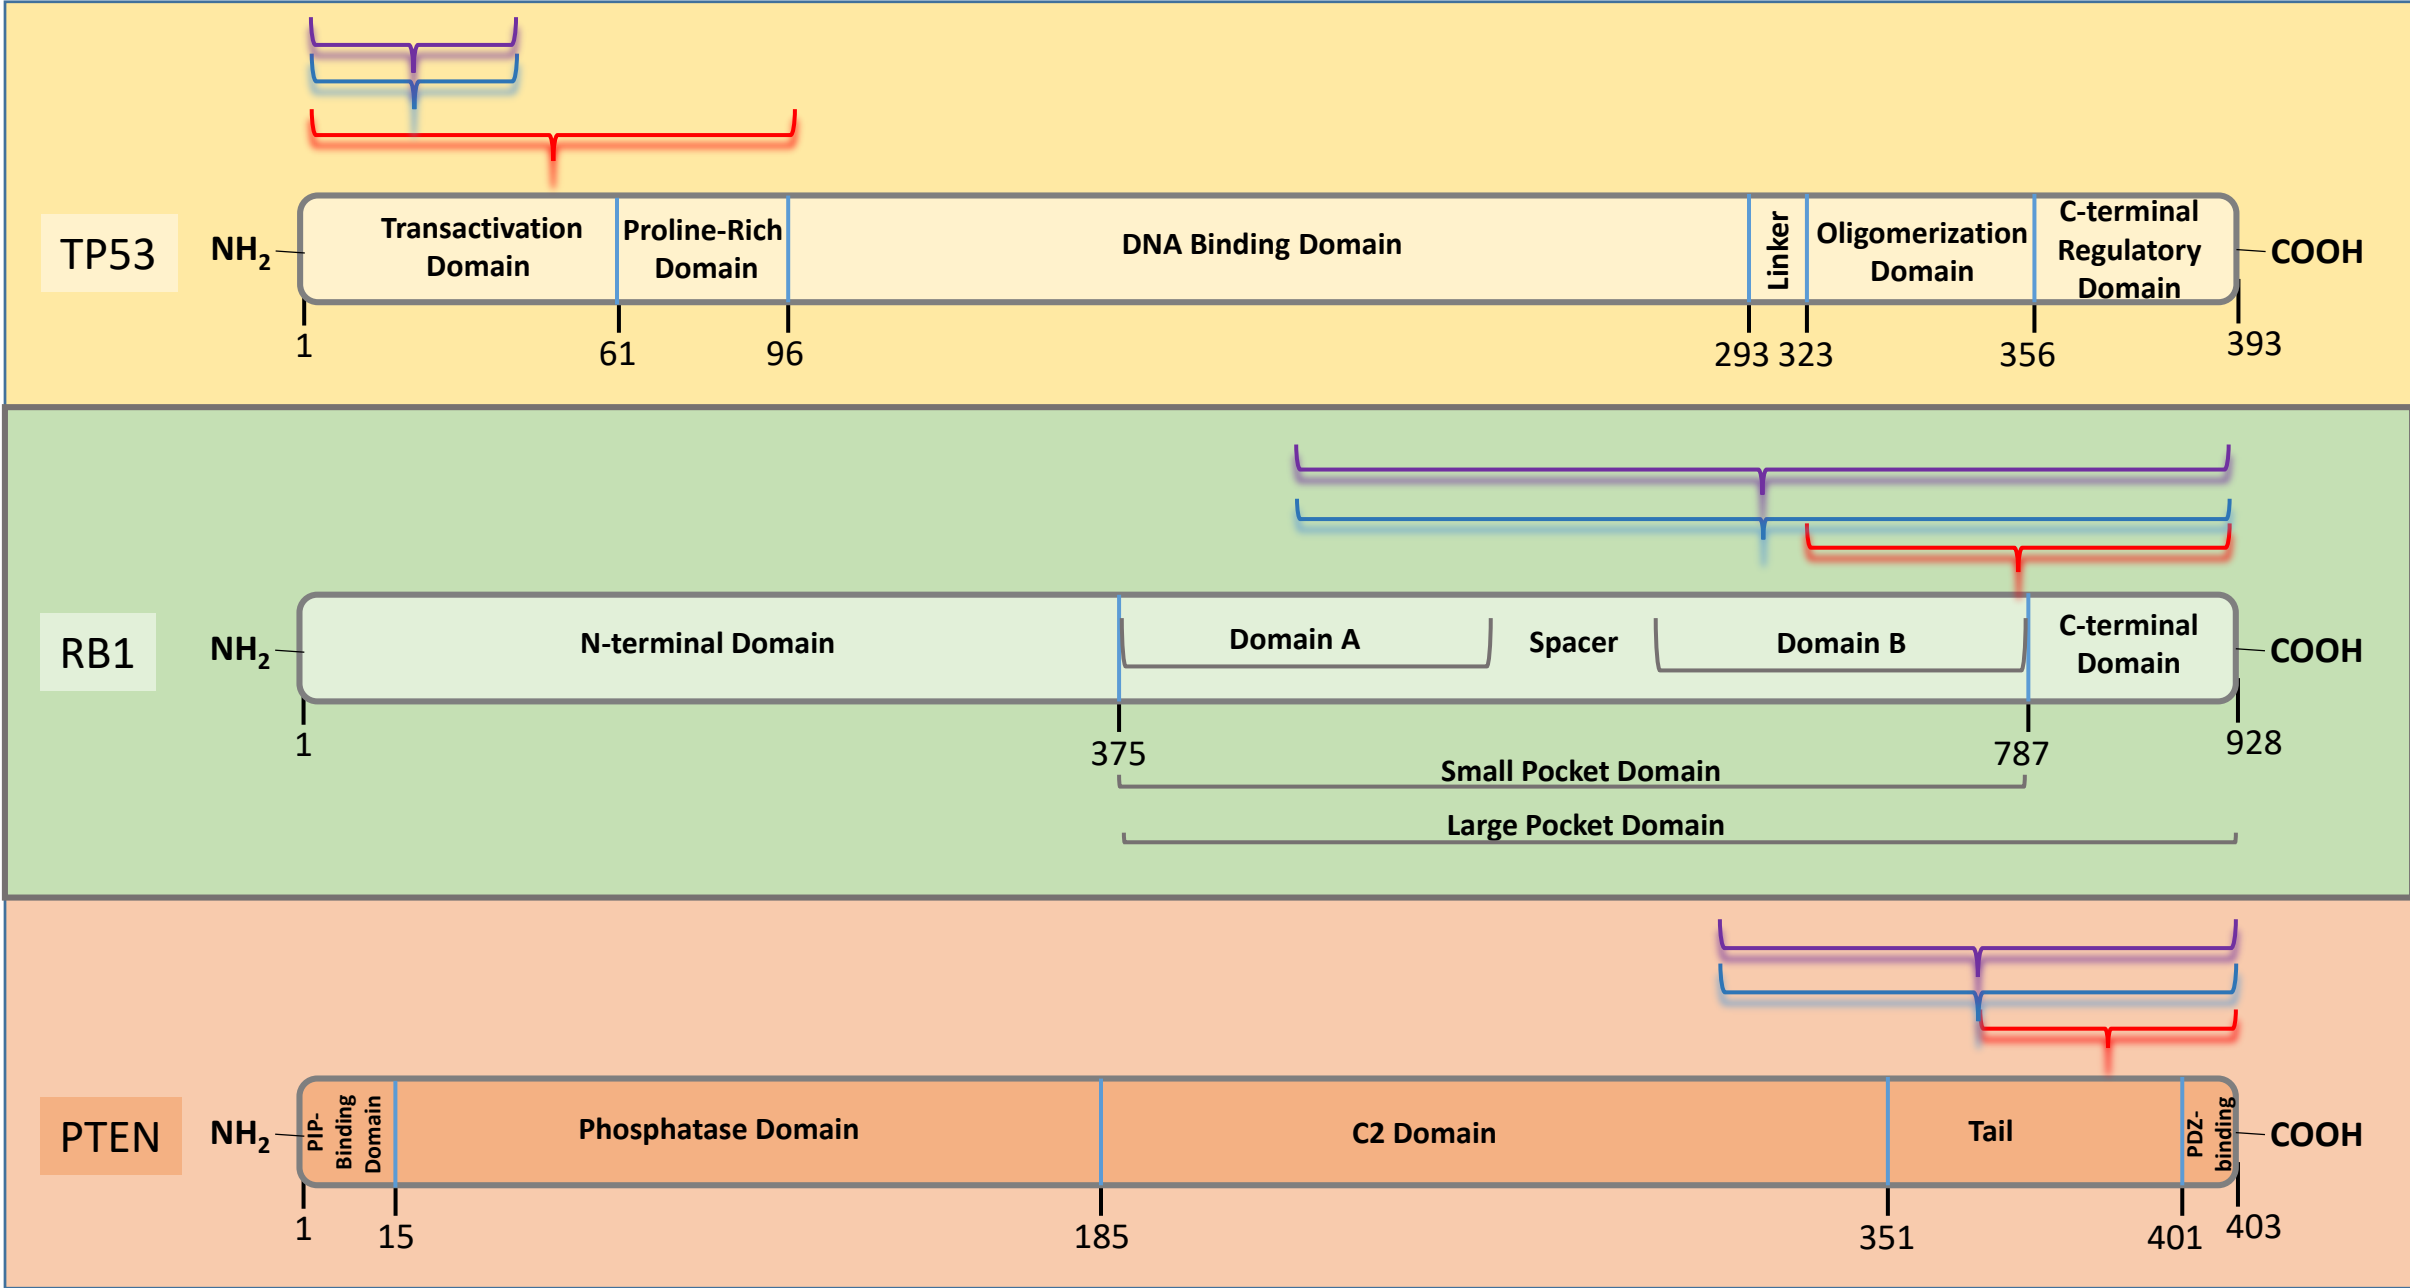

Supplementary Figure S1

LAB 1 (Clinical Lab)  
LAB 2  
LAB 3

Supplement: s1 [file s1]

Supplementary Figure S4-1

TP53

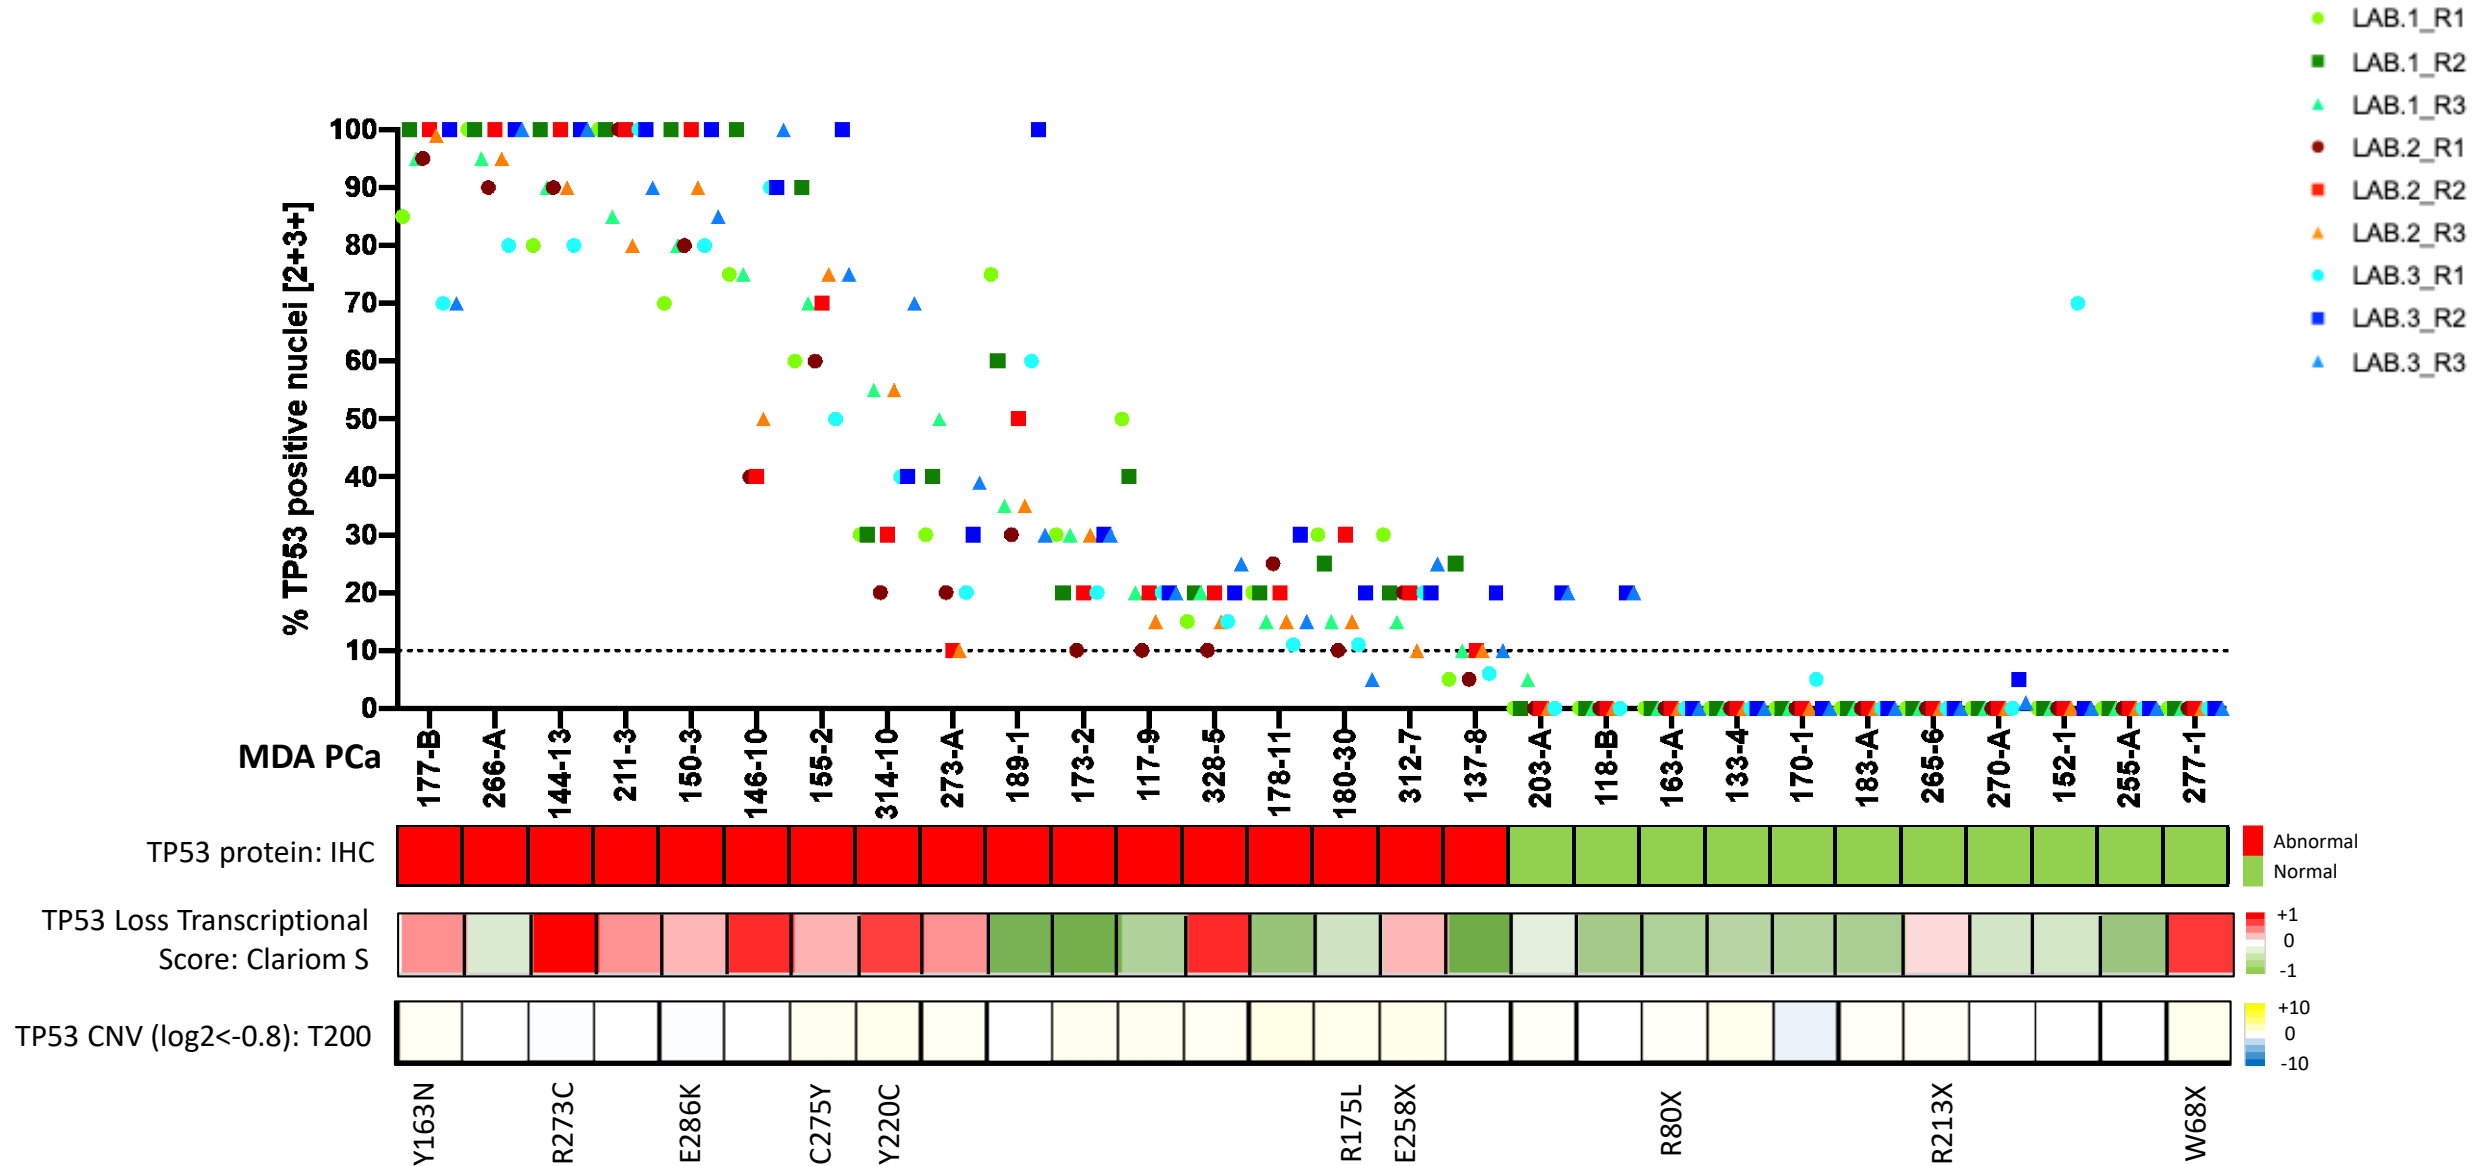

# Supplementary Figure S4-2

## RB1

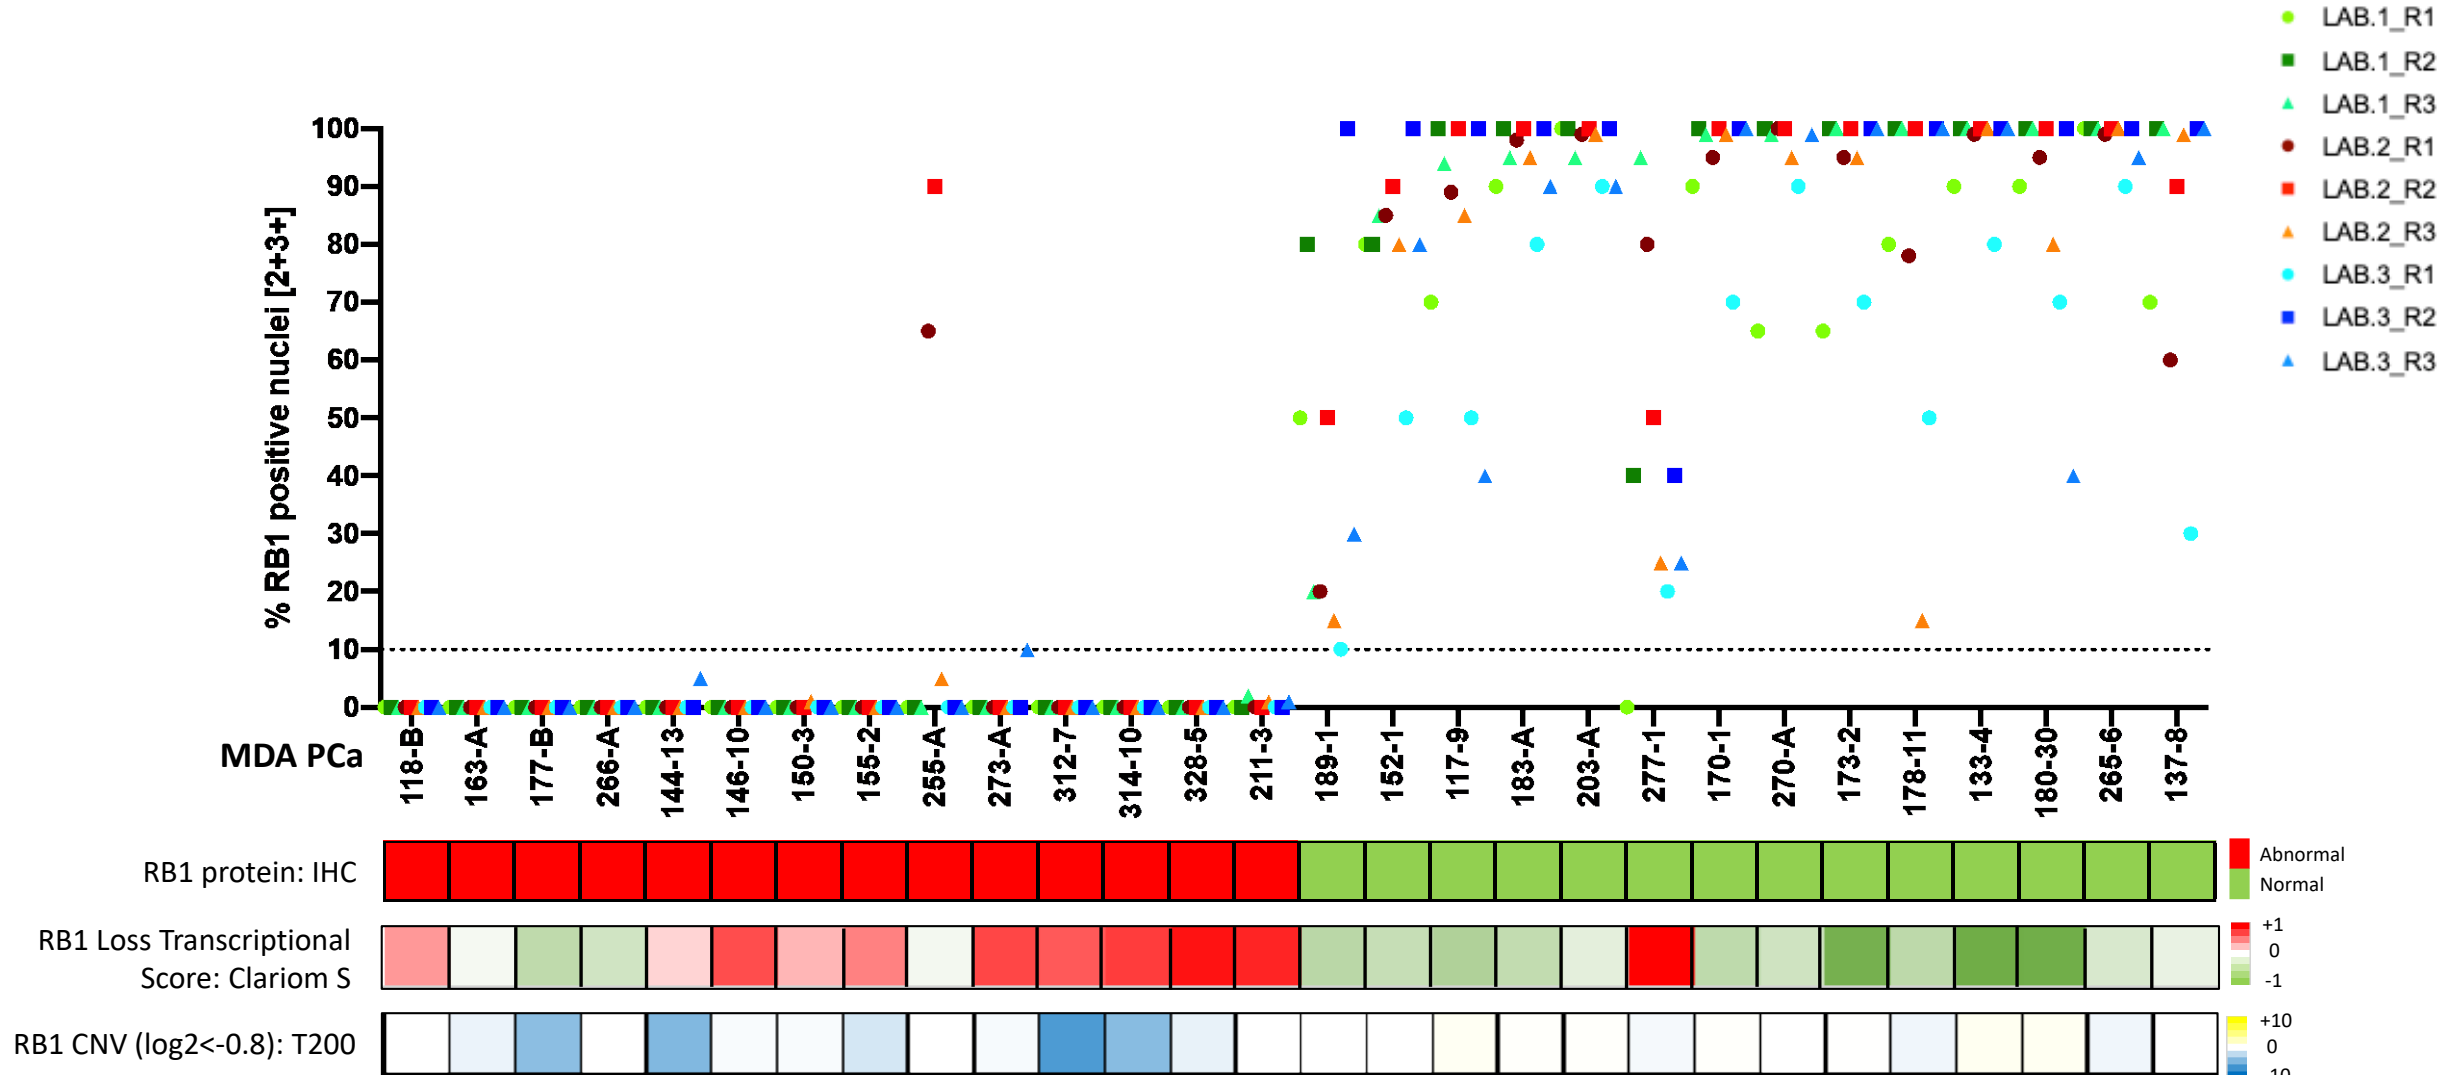

# Supplementary Figure S4-3

PTEN

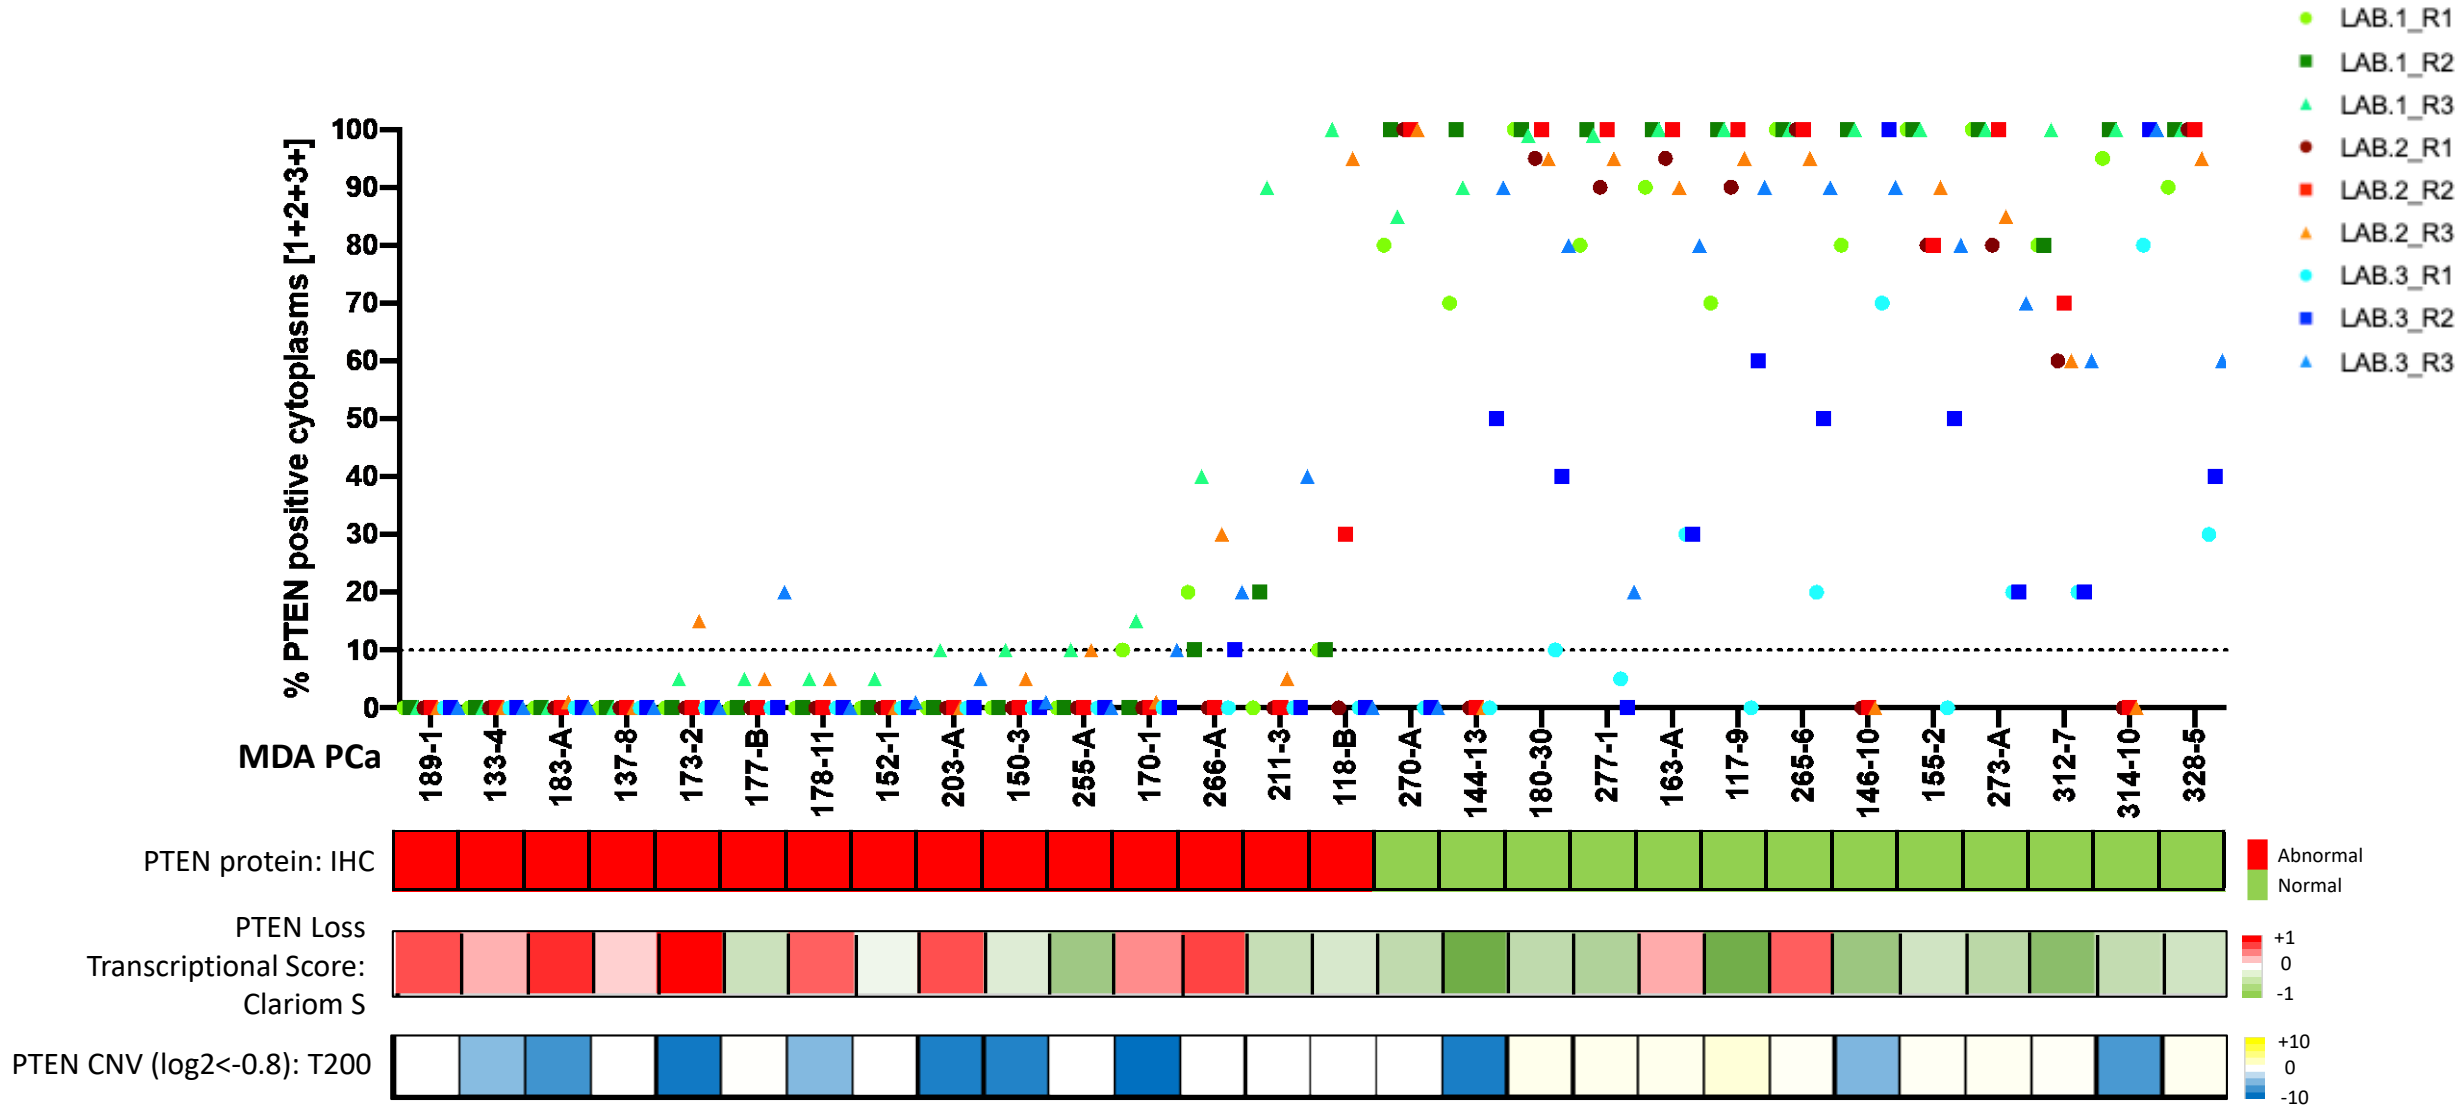

Supplement: s1 [file s1]

Supplementary Figure S2

- LAB.1\_R1
- LAB.1\_R2
- LAB.1\_R3
- LAB.2\_R1
- LAB.2\_R2
- LAB.2\_R3
- LAB.3\_R1
- LAB.3\_R2
- LAB.3\_R3

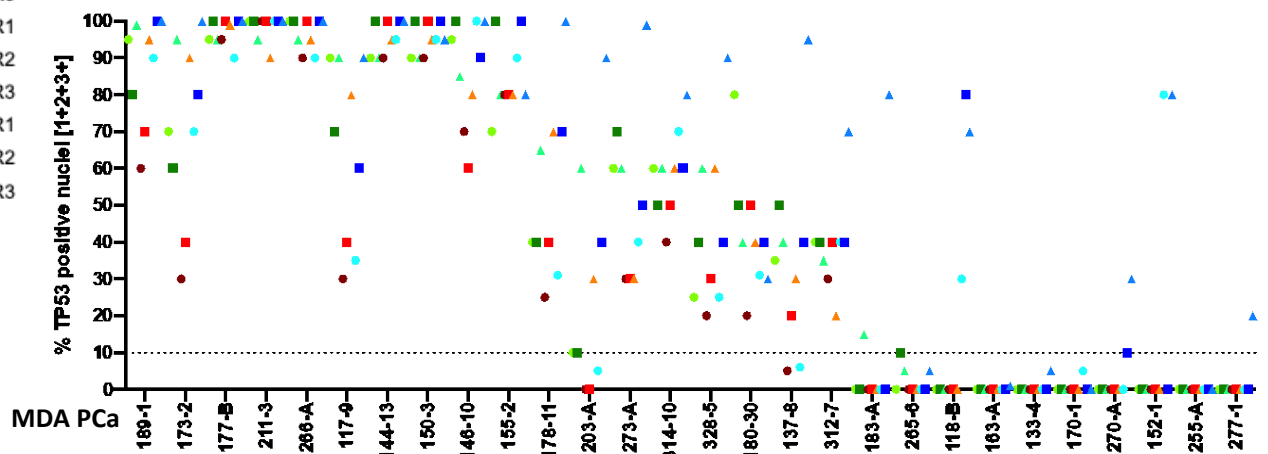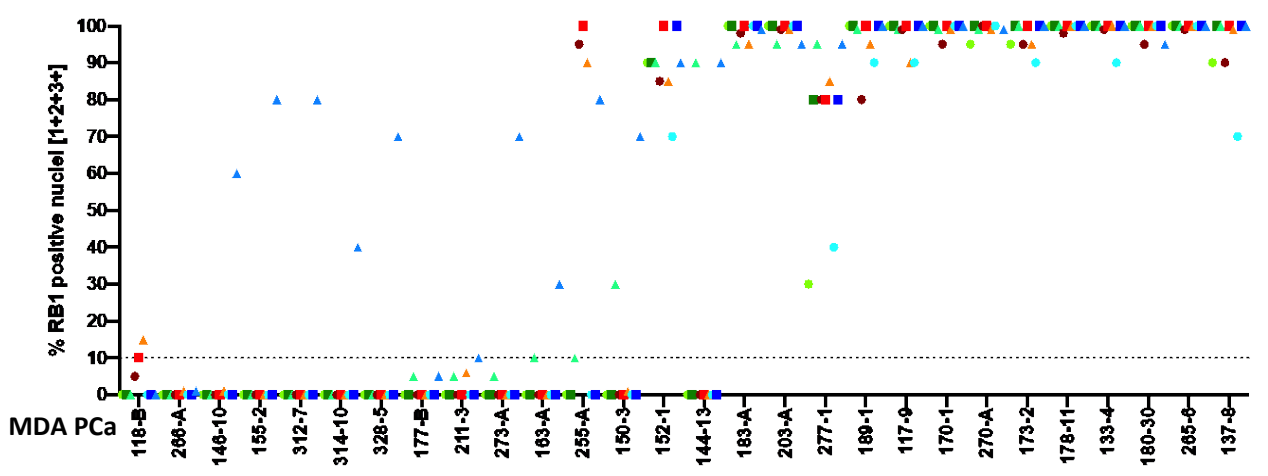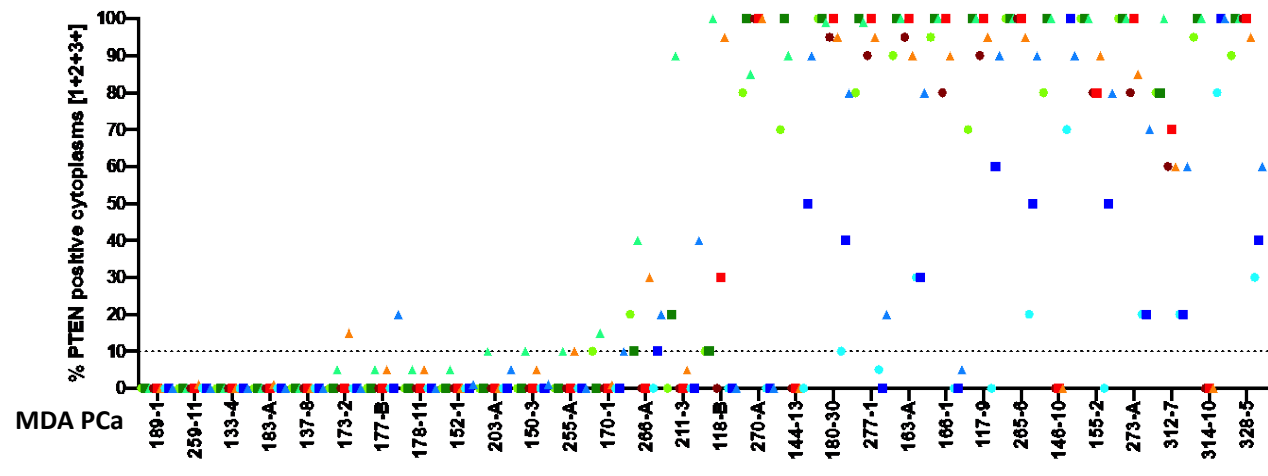

Supplement: s1 [file s1]
